# Supplementary material for: Restoring and managing low-severity fire in dry-forest landscapes of the western USA
Source: PubMed Central journal article supplement (PMC5310858; doi:10.1371/journal.pone.0172288), 2017-02-15
Supplement: pone.0172288.s005.pdf [file pone.0172288.s005.pdf]

**S1 Table. Authors, locations, and values for CFI and ITFI estimators and PMFI/FR in the 96-case calibration dataset.** Refer to S2 Table for references for all citations.

| Row number and Author(s)    | Area  | Sites                               | Area (ha) | No.† | Mean CFI (years)‡ |      |      |      | Weib. Mean ITFI | PMFI/FR (years)§ |        |        |
|-----------------------------|-------|-------------------------------------|-----------|------|-------------------|------|------|------|-----------------|------------------|--------|--------|
|                             |       |                                     |           |      | Meth              | All  | 10%  | 25%  |                 | Meth             | YrsRec | YrsTot |
| 1 Allen (1989)              | N NM  | Frijoles Canyon                     | 6600      | 75   | 2                 | 3.1  | 7.2  | 11.6 |                 | 5                | 23.1   | 30.9   |
| 2 Arabas et al. (2006)      | C OR  | Lava Cast Forest                    | 1100      | 85   | 3                 | 4.8  | 9.8  | 24.8 | 37.0            | 4                | 39.9   | 83.3   |
| 3 Baisan and Swetnam (1990) | SE AZ | Mica Mountain                       | 1600      | 44¶  | 3                 | 3.1  | 5.6  | 7.4  | 12.5            | 4                | 12.6   | 15.0   |
| 4 Baker (2006)              | N AZ  | Powell, Fire Point, Rainbow Plateau | 2566      | 119  | 1                 | 6.9  |      | 13.1 |                 | 1                |        | 45.1   |
| 5 Beaty and Taylor (2001)   | N CA  | Combined study areas                | 427       | 56   | 2                 | 7.6  |      | 14.2 |                 | 1                |        | 28.2   |
| 6 Beaty and Taylor (2001)   | N CA  | North-facing                        | 105       | 8    | 2                 | 33.8 |      | 33.8 |                 | 1                |        | 42.5   |
| 7 Beaty and Taylor (2001)   | N CA  | Northern headwaters                 | 102       | 15   | 2                 | 16.3 |      | 26.1 |                 | 1                |        | 27.2   |
| 8 Beaty and Taylor (2001)   | N CA  | South-facing                        | 134       | 19   | 2                 | 11.5 |      | 13.5 |                 | 1                |        | 17.4   |
| 9 Beaty and Taylor (2001)   | N CA  | Southern headwaters                 | 87        | 14   | 2                 | 19.1 |      | 21.6 |                 | 1                |        | 37.2   |
| 10 Bekker and Taylor (2001) | N CA  | White fir-Jeffrey pine              | 537       | 18   | 2                 | 5.5  |      |      |                 | 1                |        | 21.5   |
| 11 Bekker and Taylor (2001) | N CA  | White fir-Sugar pine                | 335       | 9    | 2                 | 11.0 |      |      |                 | 1                |        | 33.7   |
| 12 Bigio (2013)             | SW CO | Haflin Canyon                       | 600       | 19   | 3                 | 14.2 | 16.8 | 26.4 | 42.1            | 4                | 34.3   | 50.8   |
| 13 Bigio (2013)             | SW CO | Steven's Canyon                     | 1000      | 28   | 3                 | 12.8 | 15.3 | 22.2 | 37.6            | 4                | 44.0   | 74.0   |
| 14 Bigio et al. (2010)      | SW CO | Vallecito Country Market            | 100       | 17   | 3                 | 14.3 | 16.7 | 20.0 | 27.8            | 4                | 28.3   | 32.6   |
| 15 Bork (1984)              | C OR  | Cabin Lake                          | 97        | 31   | 2                 | 24.0 |      |      |                 | 2                |        | 79.0   |
| 16 Bork (1984)              | C OR  | Lookout Mountain                    | 97        | 48   | 2                 | 15.0 |      |      |                 | 2                |        | 77.0   |
| 17 Bork (1984)              | C OR  | Pringle Butte                       | 97        | 35   | 2                 | 11.0 |      |      |                 | 2                |        | 31.0   |
| 18 Brown and Sieg (1996)    | W SD  | Jewel Cave East                     | 150#      | 16   | 3                 | 23.0 | 23.0 | 24.9 | 33.6            | 4                | 40.5   | 40.5   |

|                                 |       |                   |       |     |   |      |      |      |      |   |       |       |
|---------------------------------|-------|-------------------|-------|-----|---|------|------|------|------|---|-------|-------|
| 19 Brown and Wu (2005)          | SW CO | Archuleta Mesa    | 307   | 52  | 3 | 10.0 | 15.9 | 16.9 | 23.1 | 4 |       | 32.1  |
| 20 Brown et al. (2008)          | W SD  | Mount Rushmore    | 517   | 29  | 2 | 16.0 |      | 17.0 |      | 1 |       | 30.0  |
| 21 Danzer (1998)                | SE AZ | Pat Scott Peak    | 100   | 29  | 3 | 3.2  | 5.2  | 9.1  | 13.1 | 4 | 14.6  | 17.7  |
| 22 Dieterich (1983)             | NE AZ | Thomas Creek      | 166   | 21  | 3 | 3.3  | 5.4  | 11.4 | 17.3 | 4 | 13.4  | 22.1  |
| 23 Dieterich and Hibbert (1990) | N AZ  | Battle Flat       | 87    | 10  | 3 | 1.9  | 1.9  | 3.4  | 6.3  | 4 | 6.6   | 7.2   |
| 24 Donnegan et al. (2001)       | C CO  | Badger Mountain   | 100   | 55  | 3 | 9.0  |      |      | 92.8 | 4 | 81.6  | 94.1  |
| 25 Donnegan et al. (2001)       | C CO  | China Wall        | 100   | 9   | 3 | 27.5 | 27.5 |      |      | 4 | 102.0 | 138.3 |
| 26 Donnegan et al. (2001)       | C CO  | Salt Creek        | 100   | 9   | 3 | 23.6 | 23.6 | 55.2 | 89.1 | 4 | 74.1  | 106.7 |
| 27 Everett (2003)               | S CA  | Big Pine Flat     | 275   | 38  | 2 | 5.7  |      |      |      | 1 | 244.7 | 327.2 |
| 28 Everett (2003)               | S CA  | Black Mountain    | 270   | 33  | 2 | 5.2  | 17.9 |      |      | 1 | 201.5 | 269.4 |
| 29 Everett et al. (2000)        | C WA  | Mud Creek         | 12757 | 490 | 2 | 2.7  |      |      |      | 1 |       | 11.0  |
| 30 Everett et al. (2000)        | C WA  | Nile Creek        | 3240  | 233 | 2 | 2.6  |      |      |      | 1 |       | 12.2  |
| 31 Farris (2009)                | S AZ  | Mica Mountain     | 2780  | 405 | 2 | 2.2  | 9.2  | 25.5 |      | 1 |       | 26.8  |
| 32 Farris et al. (2013)         | N AZ  | Centennial Forest | 100   | 612 | 2 | 1.8  | 2.7  | 5.4  |      | 3 | 9.0   | 12.0  |
| 33 Farris et al. (2013)         | S AZ  | Mica Mountain     | 2780  | 405 | 2 | 2.1  | 6.2  | 8.0  |      | 3 | 9.4   | 12.6  |
| 34 Farris et al. (2013)         | N NM  | Monument Canyon   | 256   | 197 | 2 | 2.7  | 5.7  | 7.3  |      | 3 | 10.7  | 14.3  |
| 35 Fiegner (2002)               | S CA  | Teakettle         | 90    | 61  | 2 | 4.0  | 6.7  |      |      | 1 | 37.3  | 49.9  |
| 36 Fiegner (2002)               | S CA  | Teakettle         | 90    | 61  | 2 | 4.0  | 6.7  |      |      | 3 | 56.3  | 75.3  |
| 37 Fulé et al. (1997)           | N AZ  | Camp Navajo       | 700   | 52  | 3 | 3.7  | 4.6  | 6.5  | 13.0 | 4 | 12.7  | 19.0  |
| 38 Fulé et al. (2003a)          | N AZ  | Galahad Point     | 410   | 31  | 3 | 4.0  | 4.7  | 6.8  | 11.3 | 4 | 10.0  | 12.5  |
| 39 Fulé et al. (2003b)          | N AZ  | Fire Point        | 135   | 39  | 3 | 3.7  | 4.9  | 6.4  | 11.3 | 4 | 10.2  | 13.6  |
| 40 Fulé et al. (2003b)          | N AZ  | Grandview         | 810   | 44  | 3 | 7.1  | 7.4  | 9.3  | 14.9 | 4 | 15.4  | 17.9  |
| 41 Fulé et al. (2003b)          | N AZ  | Powell Plateau    | 315   | 46  | 3 | 3.3  | 4.5  | 9.6  | 13.7 | 4 | 13.0  | 15.4  |

|                                                      |       |                           |      |     |   |      |      |      |      |   |      |      |
|------------------------------------------------------|-------|---------------------------|------|-----|---|------|------|------|------|---|------|------|
| 42 Fulé et al. (2003b)                               | N AZ  | Rainbow Plateau           | 225  | 34  | 3 | 4.0  | 5.3  | 7.8  | 14.1 | 4 | 13.0 | 18.0 |
| 43 Fulé et al. (2003b)                               | N AZ  | Swamp Ridge               | 270  | 30  | 3 | 5.3  | 6.9  | 8.8  | 14.6 | 4 | 14.1 | 17.1 |
| 44 Fulé et al. (2003b); Dugan and Baker (2014, 2015) | N AZ  | Grandview                 | 644  | 44  | 3 | 7.1  | 7.4  | 9.3  | 18.4 | 1 |      | 25.7 |
| 45 Fulé et al. (2009)                                | SW CO | Lower Middle Mountain     | 150  | 20  | 3 | 12.9 | 19.1 | 32.3 | 30.5 | 4 | 46.9 | 46.8 |
| 46 Grissino-Mayer et al. (2004)                      | SW CO | Benson Creek              | 200  | 23  | 3 | 7.9  | 7.9  | 9.4  | 14.9 | 4 | 13.4 | 20.7 |
| 47 Grissino-Mayer et al. (2004)                      | SW CO | Five Pine Canyon          | 200  | 15  | 3 | 6.8  | 6.8  | 11.0 | 16.0 | 4 | 12.9 | 15.8 |
| 48 Grissino-Mayer et al. (2004)                      | SW CO | Monument                  | 200  | 18  | 3 | 20.6 | 22.6 | 25.1 | 33.2 | 4 | 27.3 | 37.5 |
| 49 Grissino-Mayer et al. (2004)                      | SW CO | Plateau                   | 150  | 21  | 3 | 6.2  | 7.8  | 8.7  | 15.9 | 4 | 11.6 | 15.2 |
| 50 Grissino-Mayer et al. (2004)                      | SW CO | Smoothing Iron            | 200  | 23  | 3 | 13.3 | 16.5 | 21.5 | 25.7 | 4 | 22.2 | 29.0 |
| 51 Grissino-Mayer et al. (2004)                      | SW CO | Taylor Creek              | 100  | 16  | 3 | 18.7 | 21.8 | 21.8 | 26.7 | 4 | 23.6 | 29.2 |
| 52 Grissino-Mayer et al. (2004)                      | SW CO | Turkey Springs            | 200  | 28  | 3 | 10.8 | 10.8 | 13.3 | 21.1 | 4 | 14.4 | 26.4 |
| 53 Heinlein et al. (2005)                            | N AZ  | San Francisco Peaks East  | 160  | 18  | 3 | 5.2  | 5.5  | 9.9  | 17.3 | 4 | 18.1 | 23.2 |
| 54 Heinlein et al. (2005)                            | N AZ  | San Francisco Peaks West  | 160  | 16  | 3 | 5.4  | 5.4  | 9.1  | 15.5 | 4 | 16.2 | 20.6 |
| 55 Heyerdahl (1997)                                  | NE OR | Baker City                | 3812 | 114 | 3 | 3.4  | 6.8  | 10.6 | 18.1 | 1 |      | 15.3 |
| 56 Heyerdahl (1997)                                  | NE OR | Baker City                | 3812 | 114 | 3 | 3.4  | 6.8  | 10.6 | 18.1 | 4 | 16.5 | 22.7 |
| 57 Heyerdahl (1997)                                  | NE OR | Dugout                    | 8585 | 215 | 3 | 3.1  | 8.4  | 11.8 | 21.4 | 1 |      | 15.3 |
| 58 Heyerdahl (1997)                                  | NE OR | Dugout                    | 8585 | 215 | 3 | 3.1  | 8.4  | 11.8 | 21.4 | 4 | 17.3 | 24.8 |
| 59 Heyerdahl (1997)                                  | NE OR | Imnaha                    | 2095 | 110 | 3 | 5.0  | 11.1 | 19.9 | 33.8 | 1 |      | 28.4 |
| 60 Heyerdahl (1997)                                  | NE OR | Imnaha                    | 2095 | 110 | 3 | 5.0  | 11.1 | 19.9 | 33.8 | 4 | 24.1 | 37.5 |
| 61 Heyerdahl (1997)                                  | NE OR | Tucannon                  | 2002 | 86  | 3 | 5.7  | 9.8  | 26.2 | 39.8 | 1 |      | 30.5 |
| 62 Heyerdahl (1997)                                  | NE OR | Tucannon                  | 2002 | 86  | 3 | 5.7  | 9.8  | 26.2 | 39.8 | 4 | 27.5 | 41.4 |
| 63 Heyerdahl et al. (2008)                           | W MT  | McCormick Creek           | 148  | 17  | 3 | 11.1 | 11.1 | 12.2 | 18.0 | 4 | 15.4 | 19.4 |
| 64 Heyerdahl et al. (2012)                           | S BC  | Middle Stein River Valley | 1105 | 155 | 3 | 3.5  | 8.2  | 14.7 | 27.9 | 4 | 21.0 | 40.5 |

|                                 |      |                        |       |     |   |      |      |      |      |   |      |      |
|---------------------------------|------|------------------------|-------|-----|---|------|------|------|------|---|------|------|
| 65 Heyerdahl, no publication    | C OR | Green Ridge            | 866   | 92  | 3 | 7.8  | 10.9 | 13.2 | 34.6 | 4 | 19.0 | 43.0 |
| 66 Heyerdahl, no publication    | C OR | Lytle Creek            | 766   | 134 | 3 | 5.6  | 7.3  | 9.8  | 26.7 | 4 | 12.8 | 37.6 |
| 67 Heyerdahl, no publication    | C OR | McKay Creek            | 782   | 115 | 3 | 7.9  | 8.8  | 10.1 | 24.5 | 4 | 15.6 | 35.3 |
| 68 Huffman et al. (2015)        | N AZ | Mogollon Rim           | 1135  | 133 | 2 | 2.0  | 3.0  | 8.5  |      | 1 | 14.4 | 19.3 |
| 69 Jones (2005)                 | W MT | Lubrecht               | 379   | 46  | 3 | 9.0  | 10.5 | 14.4 | 23.3 | 4 | 19.9 | 27.4 |
| 70 Kernan and Hessler (2010)    | E WA | Entiat                 | 15708 | 469 | 2 | 3.3  |      | 7.0  |      | 1 |      | 13.1 |
| 71 Kernan and Hessler (2010)    | E WA | Nile Creek             | 4033  | 232 | 2 | 3.3  |      | 10.0 |      | 1 |      | 17.0 |
| 72 Kernan and Hessler (2010)    | E WA | South Deep             | 10809 | 151 | 2 | 9.3  |      | 26.0 |      | 1 |      | 45.3 |
| 73 Kernan and Hessler (2010)    | E WA | Swauk                  | 12644 | 665 | 2 | 1.8  |      | 14.0 |      | 1 |      | 15.8 |
| 74 Margolis and Balmat (2009)   | N NM | Dry Mixed Conifer      | 1200  | 65  | 3 | 12.4 | 20.2 | 31.6 | 49.5 | 4 | 52.6 | 74.7 |
| 75 Margolis and Balmat (2009)   | N NM | Ponderosa Pine         | 1600  | 76  | 3 | 4.3  | 9.1  | 20.8 | 25.8 | 4 | 26.5 | 39.8 |
| 76 Scholl and Taylor (2010)     | C CA | Tuolumne Meadows       | 2125  | 209 | 2 | 1.2  | 2.4  | 10.7 |      | 3 |      | 13.0 |
| 77 Shapiro-Miller et al. (2007) | W ID | Powderhouse: 1924-1986 | 611   | 74  | 2 | 31.5 |      |      |      | 1 |      | 44.5 |
| 78 Shapiro-Miller et al. (2007) | W ID | Powderhouse: 1924-1986 | 611   | 74  | 2 | 31.5 |      |      |      | 4 | 37.2 | 38.9 |
| 79 Shapiro-Miller et al. (2007) | W ID | Powderhouse: 1739-1889 | 611   | 74  | 3 | 6.8  | 10.0 | 18.8 | 23.9 | 4 | 19.2 | 33.0 |
| 80 Taylor (2000)                | N CA | Jeffrey Pine           | 473   | 36  | 2 | 4.9  |      |      |      | 1 |      | 24.5 |
| 81 Taylor (2000)                | N CA | Jeffrey Pine-White Fir | 868   | 22  | 2 | 7.5  |      |      |      | 1 |      | 31.3 |
| 82 Taylor and Skinner (1998)    | N CA | 1626-1849              | 1570  | 204 | 2 |      |      |      |      | 2 |      | 19.0 |
| 83 Taylor and Skinner (1998)    | N CA | 1850-1904              | 1570  | 204 | 2 |      |      |      |      | 2 |      | 12.3 |
| 84 Taylor and Skinner (1998)    | N CA | 1905-1992              | 1570  | 204 | 2 |      |      |      |      | 2 |      | 25.5 |
| 85 Taylor and Skinner (2003)    | N CA | Hayfork: 1628-1849     | 2325  | 329 | 3 | 5.2  | 5.2  | 27.0 | 22.9 | 2 |      | 20.0 |
| 86 Taylor and Skinner (2003)    | N CA | Hayfork: 1850-1904     | 2325  | 329 | 3 | 10.3 | 10.3 | 10.3 |      | 2 |      | 18.0 |
| 87 Touchan et al. (1996)        | N NM | Clear Creek Campground | 130   | 20  | 2 | 5.6  | 8.2  | 13.1 | 15.6 | 4 | 16.5 | 17.9 |

|                                          |      |                           |       |    |   |       |       |       |      |   |       |       |
|------------------------------------------|------|---------------------------|-------|----|---|-------|-------|-------|------|---|-------|-------|
| 88 Touchan et al. (1996)                 | N NM | Gallina Mesa              | 285   | 25 | 2 | 5.1   | 8.0   | 11.5  | 18.5 | 4 | 20.2  | 24.7  |
| 89 Veblen et al. (2000)                  | N CO | BM6                       | 89    | 11 | 3 | 103.0 | 103.0 | 103.0 | 80.9 | 4 | 100.0 | 100.0 |
| 90 Veblen et al. (2000)                  | N CO | BM10                      | 119   | 7  | 3 | 40.0  | 40.0  | 63.0  |      | 4 | 67.9  | 112.6 |
| 91 Veblen et al. (2000)                  | N CO | BM15                      | 105   | 37 | 3 | 8.0   | 10.1  | 17.4  | 30.1 | 4 | 27.0  | 44.9  |
| 92 Veblen et al. (2000)                  | N CO | BM18                      | 95    | 21 | 3 | 51.3  | 51.3  | 68.3  | 79.0 | 4 | 77.5  | 103.5 |
| 93 Veblen et al. (2000)                  | N CO | BM22                      | 148   | 11 | 3 | 47.0  | 47.0  | 47.0  |      | 4 | 49.8  | 61.9  |
| 94 Veblen et al. (2000)                  | N CO | BM23                      | 164   | 12 | 3 | 28.8  | 29.6  | 29.6  | 63.6 | 4 | 53.4  | 80.3  |
| 95 Wright (1996); Wright and Agee (2004) | C WA | Teaway Demonstration Area | 30000 | 92 | 3 | 2.0   | 5.2   | 14.2  | 16.4 | 1 |       | 26.0  |
| 96 Wright (1996); Wright and Agee (2004) | C WA | Teaway Demonstration Area | 30000 | 92 | 3 | 2.0   | 5.2   | 14.2  | 16.4 | 4 | 16.0  | 20.2  |

*Notes*

† Number of fire-scarred trees sampled.

‡ Fire interval methods (**Meth**) include: 1. Author estimate from digital spatial fire records, 2. Author estimate in text, a table, or a graph, 3. My estimate from author's FHX file using FHAES

§ Fire rotation methods (**Meth**) include, in decreasing order of expected accuracy: 1. Author estimate from fire-year maps, fire atlases, or digital spatial fire records, 2. My estimate from area burned in an author table or graph, 3. Author estimate from the ratio method, 4. My estimate from the ratio method and author's FHX file using FHAES, 5. My estimate from the ratio method using author's data in a table or interpolated from a graph. **YrsTot** is fire rotation, in years, from a ratio method based on percentage of total sample trees or plots. **YrsRec** is fire rotation, in years, from a ratio method based on percentage of recorder trees. Where fire rotation-YrsTot was not available, I estimated it using the correction equation in Table 3 of the main text, and the estimate is shown in italics, but this estimate was not used in the regression analysis, only to provide a prediction estimate for the 342-case dataset.

¶ Baisan and Swetnam (1990) reported that 50 of 54 sampled fire-scarred trees could be cross-dated, but data from only 44 were in the IMPD dataset.

# This is my estimate from enclosing the fire-scarred trees (Brown and Sieg 1996 Figure 1) with a minimum rectangle.
