# Supplementary material for: Restoring and managing low-severity fire in dry-forest landscapes of the western USA
Source: PubMed Central journal article supplement (PMC5310858; doi:10.1371/journal.pone.0172288), 2017-02-15
Supplement: pone.0172288.s006.pdf [file pone.0172288.s006.pdf]

**S2 Table. Authors, sites, the Weibull mean ITFI estimate, and the calibrated or predicted PMFI/FR for the merged 342-site dataset.**

| State/Author(s)†                           | Sites                    | State | Weibull Mean ITFI (years) | Calibrated or predicted | Calibrated/ Predicted PMFI/FR (years) |
|--------------------------------------------|--------------------------|-------|---------------------------|-------------------------|---------------------------------------|
| <i>ARIZONA</i>                             |                          |       |                           |                         |                                       |
| Dieterich and Hibbert (1990)               | Battle Flat              | AZ    | 6.31                      | Calibrated              | 7.20                                  |
| Kaib and Swetnam, no publ.                 | Mt. Ord                  | AZ    | 8.72                      | Predicted               | 10.60                                 |
| Dieterich (1980)                           | Chimney Springs          | AZ    | 8.80                      | Predicted               | 10.70                                 |
| Swetnam and Baisan (1996)                  | Walnut Canyon            | AZ    | 8.81                      | Predicted               | 10.71                                 |
| Swetnam et al. (2001)                      | Palisades                | AZ    | 9.21                      | Predicted               | 11.20                                 |
| Farris et al. (2013)                       | Centennial Forest        | AZ    | -                         | Predicted               | 12.03                                 |
| Fulé et al. (2003a)                        | Galahad Point            | AZ    | 11.26                     | Calibrated              | 12.50                                 |
| Seklecki et al. (1996)                     | Rustler Park             | AZ    | 10.32                     | Predicted               | 12.55                                 |
| Farris et al. (2013)                       | Mica Mountain            | AZ    | -                         | Predicted               | 12.57                                 |
| Baisan et al. (1998)                       | Rose Canyon Lower        | AZ    | 10.80                     | Predicted               | 13.13                                 |
| Danzer (1998)                              | Sawmill Canyon           | AZ    | 10.92                     | Predicted               | 13.28                                 |
| Fulé et al. (2003b)                        | Fire Point               | AZ    | 11.25                     | Calibrated              | 13.60                                 |
| Baisan and Swetnam (1990)                  | Mica Mountain            | AZ    | 12.48                     | Calibrated              | 15.00                                 |
| Baisan et al. (1998)                       | Mount Lemmon             | AZ    | 12.36                     | Predicted               | 15.03                                 |
| Fulé et al. (2003b)                        | Powell Plateau           | AZ    | 13.68                     | Calibrated              | 15.40                                 |
| Baisan et al. (1998)                       | Rose Canyon Upper        | AZ    | 12.74                     | Predicted               | 15.49                                 |
| Swetnam and Baisan (1996)                  | Josephine Saddle         | AZ    | 12.90                     | Predicted               | 15.69                                 |
| Baisan et al. (1998)                       | Rose Canyon East         | AZ    | 13.40                     | Predicted               | 16.29                                 |
| Fulé et al. (2003b)                        | Swamp Ridge              | AZ    | 14.56                     | Calibrated              | 17.10                                 |
| Danzer (1998)                              | Pat Scott Peak           | AZ    | 13.06                     | Calibrated              | 17.70                                 |
| Fulé et al. (2003b)                        | Grandview                | AZ    | 14.89                     | Calibrated              | 17.90                                 |
| Fulé et al. (2003b)                        | Rainbow Plateau          | AZ    | 14.10                     | Calibrated              | 18.00                                 |
| Fulé et al. (1997)                         | Camp Navajo              | AZ    | 13.02                     | Calibrated              | 19.00                                 |
| Huffman et al. (2015)                      | Mogollon Rim             | AZ    | -                         | Predicted               | 19.25                                 |
| Heinlein et al. (2005)                     | San Francisco Peaks West | AZ    | 15.50                     | Calibrated              | 20.60                                 |
| Dieterick (1983)                           | Thomas Creek             | AZ    | 17.31                     | Calibrated              | 22.10                                 |
| Heinlein et al. (2005)                     | San Francisco Peaks East | AZ    | 17.32                     | Calibrated              | 23.20                                 |
| Fulé et al. (2003b; Dugan and Baker (2014) | Grandview                | AZ    | 18.40                     | Calibrated              | 25.70                                 |
| <i>CALIFORNIA</i>                          |                          |       |                           |                         |                                       |
| Caprio and Swetnam (1995)                  | Ash Peak Ridge           | CA    | 7.04                      | Predicted               | 8.56                                  |

|                                |                                           |    |       |            |        |
|--------------------------------|-------------------------------------------|----|-------|------------|--------|
| Taylor and Skinner (1998)      | Thompson Ridge: 1850-1904                 | CA | -     | Calibrated | 12.30  |
| Scholl and Taylor (2010)       | Tuolumne River                            | CA | -     | Calibrated | 13.00  |
| Beaty and Taylor (2001)        | South-facing                              | CA | -     | Calibrated | 17.40  |
| Caprio and Swetnam (1995)      | Bobcat Point Pine                         | CA | 15.09 | Predicted  | 18.35  |
| Taylor and Skinner (1998)      | Thompson Ridge: 1626-1849                 | CA | -     | Calibrated | 19.00  |
| Taylor and Skinner (2003)      | Hayfork: 1628-1849                        | CA | 22.86 | Calibrated | 20.00  |
| Bekker and Taylor (2001)       | White fir-Jeffrey pine                    | CA | -     | Calibrated | 21.50  |
| Caprio and Swetnam (1995)      | High Sierra Ridge Pine                    | CA | 18.75 | Predicted  | 22.80  |
| Taylor (2000)                  | Prospect Peak: Jeffrey Pine               | CA | -     | Calibrated | 24.50  |
| Beaty and Taylor (2001)        | Northern headwaters                       | CA | -     | Calibrated | 27.20  |
| Beaty and Taylor (2001)        | Combined study areas                      | CA | -     | Calibrated | 28.20  |
| Taylor (2000)                  | Prospect Peak: Jeffrey Pine-<br>White fir | CA | -     | Calibrated | 31.30  |
| Bekker and Taylor (2001)       | White fir-Sugar pine                      | CA | -     | Calibrated | 33.70  |
| Beaty and Taylor (2001)        | Southern headwaters                       | CA | -     | Calibrated | 37.20  |
| Swetnam et al., no publication | Buck Rock Flat                            | CA | 32.11 | Predicted  | 39.05  |
| Beaty and Taylor (2001)        | North-facing                              | CA | -     | Calibrated | 42.50  |
| Fiegener (2002)                | Teakettle                                 | CA | -     | Predicted  | 49.87  |
| Fiegener (2002)                | Teakettle                                 | CA | -     | Predicted  | 75.31  |
| Everett (2003)                 | Black Mountain                            | CA | -     | Predicted  | 269.41 |
| Everett (2003)                 | Big Pine Flat                             | CA | -     | Predicted  | 327.16 |
| <i>COLORADO</i>                |                                           |    |       |            |        |
| Grissino-Mayer et al. (2004)   | Plateau                                   | CO | 15.86 | Calibrated | 15.20  |
| Grissino-Mayer et al. (2004)   | Five Pine Canyon                          | CO | 15.96 | Calibrated | 15.80  |
| Veblen et al. (2000)           | BM34                                      | CO | 14.31 | Predicted  | 17.40  |
| Brown and Wu (2005)            | Archuleta Mesa Plot A05                   | CO | 15.19 | Predicted  | 18.47  |
| Grissino-Mayer et al. (2004)   | Benson Creek                              | CO | 14.86 | Calibrated | 20.70  |
| Grissino-Mayer et al. (2004)   | Hermosa Creek                             | CO | 20.97 | Predicted  | 25.50  |
| Brown and Wu (2005)            | Archuleta Mesa Plot A1                    | CO | 21.49 | Predicted  | 26.13  |
| Grissino-Mayer et al. (2004)   | Turkey Springs                            | CO | 21.14 | Calibrated | 26.40  |
| Veblen et al. (2000)           | BM31                                      | CO | 23.68 | Predicted  | 28.79  |
| Grissino-Mayer et al. (2004)   | Smoothing Iron                            | CO | 25.74 | Calibrated | 29.00  |
| Grissino-Mayer et al. (2004)   | Taylor Creek                              | CO | 26.72 | Calibrated | 29.20  |
| Brown and Shepperd (2001)      | Wet Mountains South                       | CO | 25.85 | Predicted  | 31.43  |
| Brown and Wu (2005)            | Archuleta Mesa                            | CO | 23.13 | Calibrated | 32.10  |
| Veblen et al. (2000)           | BM14                                      | CO | 26.79 | Predicted  | 32.58  |

|                              |                          |    |       |            |       |
|------------------------------|--------------------------|----|-------|------------|-------|
| Brown and Shepperd (2001)    | M Kaufmanns Cabin        | CO | 26.80 | Predicted  | 32.59 |
| Bigio et al. (2010)          | Vallecito Country Market | CO | 27.75 | Calibrated | 32.60 |
| Grissino-Mayer et al. (2004) | Monument                 | CO | 33.16 | Calibrated | 37.50 |
| Bigio (2013)                 | Marina Basin             | CO | 30.95 | Predicted  | 37.64 |
| Grissino-Mayer et al. (2004) | Burnette Canyon          | CO | 33.83 | Predicted  | 41.14 |
| Brown and Shepperd (2001)    | Black Mountain           | CO | 35.28 | Predicted  | 42.90 |
| Brown and Wu (2005)          | Archuleta Mesa Plot AA1  | CO | 36.00 | Predicted  | 43.78 |
| Veblen et al. (2000)         | BM15                     | CO | 30.12 | Calibrated | 44.92 |
| Fulé et al. (2009)           | Lower Middle Mountain    | CO | 30.53 | Calibrated | 46.80 |
| Veblen et al. (2000)         | BM28                     | CO | 39.34 | Predicted  | 47.84 |
| Brown and Wu (2005)          | Archuleta Mesa Plot B2   | CO | 40.02 | Predicted  | 48.66 |
| Veblen et al. (2000)         | BM24                     | CO | 40.26 | Predicted  | 48.96 |
| Brown and Wu (2005)          | Archuleta Mesa Plot C2   | CO | 41.52 | Predicted  | 50.49 |
| Bigio et al. (2010)          | Haflin Canyon            | CO | 42.11 | Calibrated | 50.80 |
| Veblen et al. (2000)         | BM11                     | CO | 42.27 | Predicted  | 51.40 |
| Brown and Shepperd (2001)    | Manitou Demo Plot        | CO | 42.34 | Predicted  | 51.49 |
| Veblen et al. (2000)         | BM8                      | CO | 47.23 | Predicted  | 57.43 |
| Veblen et al. (2000)         | BM9                      | CO | 48.61 | Predicted  | 59.11 |
| Brown and Shepperd (2001)    | Mica Mine                | CO | 49.71 | Predicted  | 60.45 |
| Brown and Wu (2005)          | Archuleta Mesa Plot AA15 | CO | 50.41 | Predicted  | 61.30 |
| Veblen et al. (2000)         | BM22                     | CO | -     | Calibrated | 61.90 |
| Brown and Shepperd (2001)    | Parachute Hill           | CO | 51.75 | Predicted  | 62.93 |
| Veblen et al. (2000)         | BM20                     | CO | 53.57 | Predicted  | 65.14 |
| Veblen et al. (2000)         | BM32                     | CO | 58.07 | Predicted  | 70.61 |
| Brown et al. (2000)          | Hot Creek                | CO | 58.44 | Predicted  | 71.06 |
| Brown and Wu (2005)          | Archuleta Mesa Plot B3   | CO | 58.97 | Predicted  | 71.71 |
| Veblen et al. (2000)         | BM13                     | CO | 59.80 | Predicted  | 72.72 |
| Bigio (2013)                 | Steven's Canyon          | CO | 37.56 | Calibrated | 74.00 |
| Brown and Wu (2005)          | Archuleta Mesa Plot C5   | CO | 64.07 | Predicted  | 77.91 |
| Veblen et al. (2000)         | BM23                     | CO | 63.59 | Calibrated | 80.30 |
| Brown and Shepperd (2001)    | Left Hand Canyon         | CO | 67.75 | Predicted  | 82.38 |
| Veblen et al. (2000)         | BM5                      | CO | 71.75 | Predicted  | 87.25 |
| Veblen et al. (2000)         | BM12                     | CO | 72.73 | Predicted  | 88.44 |
| Brown and Wu (2005)          | Archuleta Mesa Plot A15  | CO | 73.80 | Predicted  | 89.74 |
| Donnegan et al. (2001)       | BSA Shortcut             | CO | 75.54 | Predicted  | 91.86 |
| Brown and Shepperd (2001)    | Cheesman Lake South      | CO | 76.87 | Predicted  | 93.47 |

|                              |                     |    |        |            |        |
|------------------------------|---------------------|----|--------|------------|--------|
| Donnegan et al. (2001)       | Badger Mountain     | CO | 92.84  | Calibrated | 94.10  |
| Brown and Shepperd (2001)    | Washout Gulch Burn  | CO | 77.56  | Predicted  | 94.31  |
| Brown and Shepperd (2001)    | Cheesman Lake North | CO | 78.62  | Predicted  | 95.60  |
| Veblen et al. (2000)         | BM6                 | CO | 80.88  | Calibrated | 100.00 |
| Veblen et al. (2000)         | BM18                | CO | 78.98  | Calibrated | 103.50 |
| Brown and Shepperd (2001)    | Old Tree Cluster    | CO | 86.85  | Predicted  | 105.61 |
| Donnegan et al. (2001)       | Salt Creek          | CO | 89.07  | Calibrated | 106.70 |
| Brown and Shepperd (2001)    | Lone Pine           | CO | 88.59  | Predicted  | 107.73 |
| Veblen et al. (2000)         | BM39                | CO | 88.81  | Predicted  | 107.99 |
| Veblen et al. (2000)         | BM10                | CO | -      | Calibrated | 112.60 |
| Veblen et al. (2000)         | BM21                | CO | 99.22  | Predicted  | 120.65 |
| Brown and Shepperd (2001)    | Lone Pine Upper     | CO | 107.72 | Predicted  | 130.99 |
| Donnegan et al. (2001)       | China Wall          | CO | -      | Calibrated | 138.30 |
| Veblen et al. (2000)         | BM19                | CO | 114.59 | Predicted  | 139.34 |
| Veblen et al. (2000)         | BM17                | CO | 143.99 | Predicted  | 175.09 |
| <i>IDAHO</i>                 |                     |    |        |            |        |
| Heyerdahl et al. (2008)      | Warm Springs Ridge  | ID | 13.88  | Predicted  | 16.88  |
| Heyerdahl et al. (2008)      | Bannock Creek       | ID | 13.98  | Predicted  | 17.00  |
| Heyerdahl et al. (2008)      | Wash Creek          | ID | 15.98  | Predicted  | 19.43  |
| Heyerdahl et al. (2008)      | Keating Ridge       | ID | 22.26  | Predicted  | 27.07  |
| Heyerdahl et al. (2008)      | Cove Mountain       | ID | 25.53  | Predicted  | 31.04  |
| Shapiro-Miller et al. (2007) | Powderhouse         | ID | 23.89  | Calibrated | 32.95  |
| Heyerdahl et al. (2008)      | Lowman RNA          | ID | 30.73  | Predicted  | 37.37  |
| <i>MONTANA</i>               |                     |    |        |            |        |
| Heyerdahl et al. (2008)      | Sophie Lake         | MT | 10.90  | Predicted  | 13.25  |
| Heyerdahl et al. (2008)      | Sheldon Flats       | MT | 11.05  | Predicted  | 13.44  |
| Heyerdahl et al. (2008)      | Butler Creek        | MT | 12.22  | Predicted  | 14.86  |
| Heyerdahl et al. (2008)      | Blue Mountain       | MT | 12.28  | Predicted  | 14.93  |
| Heyerdahl et al. (2008)      | McCormick Creek     | MT | 18.00  | Calibrated | 19.40  |
| Heyerdahl et al. (2008)      | McMillan Mountain   | MT | 17.71  | Predicted  | 21.54  |
| Heyerdahl et al. (2008)      | Corona Road         | MT | 19.25  | Predicted  | 23.41  |
| Heyerdahl et al. (2008)      | Hunter Point        | MT | 19.84  | Predicted  | 24.13  |
| Heyerdahl et al. (2008)      | Sheafman Creek      | MT | 21.06  | Predicted  | 25.61  |
| Jones (2005)                 | Lubrecht            | MT | 23.26  | Calibrated | 27.40  |
| Heyerdahl et al. (2008)      | Crane Lookout       | MT | 25.47  | Predicted  | 30.97  |
| Heyerdahl et al. (2008)      | Sawmill Creek RNA   | MT | 27.00  | Predicted  | 32.83  |

|                                 |                               |    |       |            |       |
|---------------------------------|-------------------------------|----|-------|------------|-------|
| <i>NEW MEXICO</i>               |                               |    |       |            |       |
| Brown et al. (2001)             | Pines at Sunspot              | NM | 8.40  | Predicted  | 10.21 |
| Swetnam and Dieterich (1985)    | Langstroth Mesa               | NM | 8.62  | Predicted  | 10.48 |
| Kaye and Swetnam (1999)         | Lower San Andreas             | NM | 9.74  | Predicted  | 11.84 |
| Morino (1996)                   | Upper Fillmore West           | NM | 10.55 | Predicted  | 12.83 |
| Grissino-Mayer & Swetnam (1997) | Cerro Bandera North           | NM | 10.71 | Predicted  | 13.02 |
| Swetnam and Dieterich (1985)    | Gilita Ridge                  | NM | 10.81 | Predicted  | 13.14 |
| Swetnam and Dieterich (1985)    | McKenna Park                  | NM | 11.05 | Predicted  | 13.44 |
| Kaye and Swetnam (1999)         | Lower Pine Spring             | NM | 11.56 | Predicted  | 14.06 |
| Farris et al. (2013)            | Monument Canyon               | NM | -     | Predicted  | 14.31 |
| Brown et al. (2001)             | James Ridge                   | NM | 12.11 | Predicted  | 14.73 |
| Swetnam et al., no publication  | Cerro Balitas                 | NM | 12.32 | Predicted  | 14.98 |
| Morino (1996)                   | Upper Fillmore Side Canyon. 1 | NM | 12.48 | Predicted  | 15.18 |
| Kaye and Swetnam (1999)         | Upper San Andreas             | NM | 13.02 | Predicted  | 15.83 |
| Grissino-Mayer & Swetnam (1997) | Cerro Bandera East            | NM | 13.10 | Predicted  | 15.93 |
| Morino (1996)                   | Snag Saddle                   | NM | 14.14 | Predicted  | 17.19 |
| Baisan and Swetnam (1997)       | Capilla Peak Campground       | NM | 14.45 | Predicted  | 17.57 |
| Morino (1996)                   | Fillmore Side Canyon 2        | NM | 14.69 | Predicted  | 17.86 |
| Touchan et al. (1996)           | Clear Creek Campground        | NM | 15.61 | Calibrated | 17.90 |
| Grissino-Mayer & Swetnam (1997) | Candelaria                    | NM | 14.97 | Predicted  | 18.20 |
| Grissino-Mayer & Swetnam (1997) | La Marchanita                 | NM | 14.97 | Predicted  | 18.20 |
| Kaye and Swetnam (1999)         | Cherry Canyon                 | NM | 15.23 | Predicted  | 18.52 |
| Swetnam et al. (2001)           | Black Mountain                | NM | 15.91 | Predicted  | 19.35 |
| Baisan and Swetnam (1997)       | Canon de Turrieta             | NM | 16.02 | Predicted  | 19.48 |
| Morino (1996)                   | Rock House Spring             | NM | 16.10 | Predicted  | 19.58 |
| Brown et al. (2001)             | Monument Canyon               | NM | 16.17 | Predicted  | 19.66 |
| Morino (1996)                   | Narrows                       | NM | 16.42 | Predicted  | 19.97 |
| Kaye and Swetnam (1999)         | Upper Pine Spring             | NM | 18.11 | Predicted  | 22.02 |
| Morino (1996)                   | Fillmore Side Canyon          | NM | 18.20 | Predicted  | 22.13 |
| Morino (1996)                   | Ledge Site                    | NM | 18.44 | Predicted  | 22.42 |
| Brown et al. (2001)             | Monument Canyon Upper         | NM | 18.66 | Predicted  | 22.69 |
| Touchan et al. (1996)           | Pajarito Mountain Ridge       | NM | 19.04 | Predicted  | 23.15 |
| Baisan and Swetnam (1997)       | La Luz Trail                  | NM | 20.29 | Predicted  | 24.67 |
| Touch an et al. (1996)          | Gallina Mesa                  | NM | 18.54 | Calibrated | 24.70 |
| Swetnam and Baisan (1996)       | Ice Canyon                    | NM | 21.58 | Predicted  | 26.24 |
| Swetnam (1990)                  | Bear Wallow                   | NM | 21.74 | Predicted  | 26.44 |

|                                           |                                         |    |       |            |       |
|-------------------------------------------|-----------------------------------------|----|-------|------------|-------|
| Swetnam and Baisan (1996)                 | Continental Divide Peak                 | NM | 21.86 | Predicted  | 26.58 |
| Grissino-Mayer & Swetnam (1997)           | Cerro Rendija                           | NM | 22.19 | Predicted  | 26.98 |
| Grissino-Mayer & Swetnam (1997)           | Mesita Blanca                           | NM | 23.15 | Predicted  | 28.15 |
| Grissino-Mayer & Swetnam (1997)           | Lost Woman                              | NM | 23.50 | Predicted  | 28.58 |
| Swetnam et al., no publication            | Laguna Garule                           | NM | 23.79 | Predicted  | 28.93 |
| Grissino-Mayer & Swetnam (1997)           | Hoya de Cibola Lava Flow                | NM | 24.03 | Predicted  | 29.22 |
| Swetnam and Baisan (1996)                 | El Calderon                             | NM | 24.54 | Predicted  | 29.84 |
| Allen (1989)                              | Frijoles Canyon                         | NM | -     | Predicted  | 30.88 |
| Brown et al. (2001)                       | Delworth                                | NM | 25.73 | Predicted  | 31.29 |
| Brown et al. (2001)                       | Fir Campground                          | NM | 25.85 | Predicted  | 31.43 |
| Brown et al. (2001)                       | Peake Canyon                            | NM | 28.63 | Predicted  | 34.81 |
| Touchan et al. (1996)                     | Camp May East                           | NM | 28.91 | Predicted  | 35.15 |
| Brown et al. (2001)                       | Cosmic Ray Obs                          | NM | 29.79 | Predicted  | 36.22 |
| Swetnam and Baisan (1996)                 | Continental Divide Saddle               | NM | 29.81 | Predicted  | 36.25 |
| Brown et al. (2001)                       | Sunspot                                 | NM | 29.89 | Predicted  | 36.35 |
| Baisan et al., no publication             | Bonita Canyon                           | NM | 30.70 | Predicted  | 37.33 |
| Touchan et al. (1996)                     | Canada Bonita South                     | NM | 31.53 | Predicted  | 38.34 |
| Margolis and Balmat (2009)                | Santa Fe Watershed<br>Ponderosa Pine    | NM | 25.78 | Calibrated | 39.80 |
| Touchan et al. (1996)                     | Cerro Pedernal                          | NM | 33.56 | Predicted  | 40.81 |
| Grissino-Mayer & Swetnam (1997)           | Hidden Kipuka                           | NM | 38.90 | Predicted  | 47.30 |
| Margolis and Balmat (2009)                | Santa Fe Watershed Dry<br>Mixed Conifer | NM | 49.46 | Calibrated | 74.70 |
| <i>OREGON</i>                             |                                         |    |       |            |       |
| Heyerdahl (1997), Heyerdahl et al. (2001) | Baker City                              | OR | 18.11 | Calibrated | 15.30 |
| Heyerdahl (1997), Heyerdahl et al. (2001) | Dugout                                  | OR | 21.39 | Calibrated | 15.30 |
| Maruoka (1994)                            | Spring Mountain (12)                    | OR | 16.40 | Predicted  | 19.94 |
| Heyerdahl (1997), Heyerdahl et al. (2001) | Baker City                              | OR | 18.11 | Calibrated | 22.70 |
| Maruoka (1994)                            | Seed Orchard (4)                        | OR | 18.69 | Predicted  | 22.73 |
| Maruoka (1994)                            | Widow's Creek (1)                       | OR | 19.72 | Predicted  | 23.98 |
| Maruoka (1994)                            | East Camp Creek (5)                     | OR | 20.17 | Predicted  | 24.53 |
| Heyerdahl (1997), Heyerdahl et al. (2001) | Dugout                                  | OR | 21.39 | Calibrated | 24.80 |
| Maruoka (1994)                            | Smoothing Iron Ridge (15)               | OR | 21.93 | Predicted  | 26.67 |
| Maruoka (1994)                            | Little Bear Burn (7)                    | OR | 23.19 | Predicted  | 28.20 |

|                                           |                        |    |       |            |       |
|-------------------------------------------|------------------------|----|-------|------------|-------|
| Heyerdahl (1997), Heyerdahl et al. (2001) | Imnaha                 | OR | 33.82 | Calibrated | 28.40 |
| Maruoka (1994)                            | Five Mile Creek (6)    | OR | 24.11 | Predicted  | 29.32 |
| Maruoka (1994)                            | West Myrtle Creek (8)  | OR | 24.67 | Predicted  | 30.00 |
| Bork (1984)                               | Pringle Butte          | OR | -     | Calibrated | 31.00 |
| Heyerdahl, no publication                 | McKay Creek            | OR | 24.47 | Calibrated | 35.30 |
| Heyerdahl (1997), Heyerdahl et al. (2001) | Imnaha                 | OR | 33.82 | Calibrated | 37.50 |
| Heyerdahl, no publication                 | Lytle Creek            | OR | 26.70 | Calibrated | 37.57 |
| Maruoka (1994)                            | Raddue (2)             | OR | 33.27 | Predicted  | 40.46 |
| Heyerdahl, no publication                 | Green Ridge            | OR | 34.62 | Calibrated | 42.96 |
| Maruoka (1994)                            | Troy (14)              | OR | 36.84 | Predicted  | 44.80 |
| Maruoka (1994)                            | Dixie Butte (3)        | OR | 43.64 | Predicted  | 53.07 |
| Bork (1984)                               | Lookout Mountain       | OR | -     | Calibrated | 77.00 |
| Bork (1984)                               | Cabin Lake             | OR | -     | Calibrated | 79.00 |
| Arabas et al. (2006)                      | Lava Cast Forest       | OR | 37.00 | Calibrated | 83.25 |
| <i>SOUTH DAKOTA</i>                       |                        |    |       |            |       |
| Brown and Sieg (1999)                     | Pigtail Bridge         | SD | 17.42 | Predicted  | 21.18 |
| Brown and Sieg (1999)                     | Wind Cave North        | SD | 19.44 | Predicted  | 23.64 |
| Wienk et al. (2004)                       | Badger Game Prod. Area | SD | 22.24 | Predicted  | 27.04 |
| Brown et al. (2008)                       | Mount Rushmore         | SD | -     | Calibrated | 30.00 |
| Brown (2003, 2006)                        | Black Hills Plot 105   | SD | 26.30 | Predicted  | 31.98 |
| Brown (2003, 2006)                        | Black Hills Plot 111   | SD | 26.85 | Predicted  | 32.65 |
| Brown and Sieg (1996)                     | Jewel Cave South       | SD | 27.20 | Predicted  | 33.08 |
| Brown (2003, 2006)                        | Black Hills Plot 204   | SD | 27.89 | Predicted  | 33.91 |
| Brown (2003)                              | Bear Lodge Central     | SD | 28.87 | Predicted  | 35.11 |
| Brown (2003, 2006)                        | Black Hills Plot 210   | SD | 28.95 | Predicted  | 35.20 |
| Brown (2003)                              | Reynold's Prairie      | SD | 28.95 | Predicted  | 35.20 |
| Brown (2003, 2006)                        | Black Hills Plot 213   | SD | 30.05 | Predicted  | 36.54 |
| Brown and Sieg (1996)                     | Jewel Cave North       | SD | 30.08 | Predicted  | 36.58 |
| Brown and Sieg (1999)                     | Gobbler Ridge          | SD | 31.02 | Predicted  | 37.72 |
| Brown (2003, 2006)                        | Black Hills Plot 207   | SD | 32.25 | Predicted  | 39.22 |
| Brown (2003)                              | Riflepit Gulch West    | SD | 32.72 | Predicted  | 39.79 |
| Brown (2003, 2006)                        | Black Hills Plot 202   | SD | 32.72 | Predicted  | 39.79 |
| Brown (2003, 2006)                        | Black Hills Plot 109   | SD | 33.02 | Predicted  | 40.15 |
| Brown and Sieg (1996)                     | Jewel Cave East        | SD | 33.58 | Calibrated | 40.52 |
| Brown (2003, 2006)                        | Black Hills Plot 209   | SD | 34.04 | Predicted  | 41.39 |

|                          |                          |    |         |            |        |
|--------------------------|--------------------------|----|---------|------------|--------|
| Brown et al. (2000)      | Upper Pine Mid-Basin     | SD | 34.78   | Predicted  | 42.29  |
| Brown (2003)             | Black Hills Exp. Forest  | SD | 35.22   | Predicted  | 42.83  |
| Brown (2003, 2006)       | Black Hills Plot 112     | SD | 36.02   | Predicted  | 43.80  |
| Brown and Sieg (1996)    | Jewel Cave Central       | SD | 36.47   | Predicted  | 44.35  |
| Brown (2003)             | Bear Lodge North         | SD | 37.75   | Predicted  | 45.90  |
| Brown (2003, 2006)       | Black Hills Plot 205     | SD | 38.42   | Predicted  | 46.72  |
| Brown (2003, 2006)       | Black Hills Plot 106     | SD | 38.84   | Predicted  | 47.23  |
| Brown (2003, 2006)       | Black Hills Plot 208     | SD | 40.05   | Predicted  | 48.70  |
| Brown (2003, 2006)       | Black Hills Plot 113     | SD | 40.11   | Predicted  | 48.77  |
| Brown (2003, 2006)       | Black Hills Plot 114     | SD | 40.75   | Predicted  | 49.55  |
| Brown (2003, 2006)       | Black Hills Plot 203     | SD | 41.21   | Predicted  | 50.11  |
| Brown (2003)             | Riflepit Gulch East      | SD | 41.35   | Predicted  | 50.28  |
| Brown (2003)             | Riflepit Gulch North     | SD | 42.56   | Predicted  | 51.75  |
| Brown (2003, 2006)       | Black Hills Plot 101     | SD | 42.75   | Predicted  | 51.98  |
| Brown (2003, 2006)       | Black Hills Plot 206     | SD | 44.86   | Predicted  | 54.55  |
| Brown (2003, 2006)       | Black Hills Plot 201     | SD | 46.10   | Predicted  | 56.06  |
| Brown (2003, 2006)       | Black Hills Plot 110     | SD | 46.16   | Predicted  | 56.13  |
| Brown (2003, 2006)       | Black Hills Plot 108     | SD | 63.33   | Predicted  | 77.01  |
| Brown (2003, 2006)       | Black Hills Plot 103     | SD | 36.95 § | Predicted  | 90.16  |
| Brown (2003, 2006)       | Black Hills Plot 104     | SD | 64.33 ¶ | Predicted  | 158.70 |
| <i>WASHINGTON</i>        |                          |    |         |            |        |
| Everett et al. (2000)    | Entiat Mud Creek overall | WA | -       | Calibrated | 11.00  |
| Everett et al. (2000)    | Nile Creek overall       | WA | -       | Calibrated | 12.20  |
| Kernan and Hessel (2010) | Entiat                   | WA | -       | Calibrated | 13.10  |
| Everett et al. (2000)    | Entiat Mud Creek 165     | WA | 11.92   | Predicted  | 14.49  |
| Everett et al. (2000)    | Entiat Mud Creek 230     | WA | 11.98   | Predicted  | 14.57  |
| Everett et al. (2000)    | Entiat Mud Creek 201     | WA | 12.41   | Predicted  | 15.09  |
| Everett et al. (2000)    | Entiat Mud Creek 205     | WA | 12.50   | Predicted  | 15.20  |
| Kernan and Hessel (2010) | Swauk                    | WA | -       | Calibrated | 15.80  |
| Everett et al. (2000)    | Entiat Mud Creek 199     | WA | 13.08   | Predicted  | 15.91  |
| Everett et al. (2000)    | Entiat Mud Creek 202     | WA | 13.70   | Predicted  | 16.66  |
| Kernan and Hessel (2010) | Nile Creek               | WA | -       | Calibrated | 17.00  |
| Everett et al. (2000)    | Nile Creek 10            | WA | 14.21   | Predicted  | 17.28  |
| Everett et al. (2000)    | Entiat Mud Creek 196     | WA | 14.29   | Predicted  | 17.38  |
| Everett et al. (2000)    | Entiat Mud Creek 207     | WA | 15.07   | Predicted  | 18.33  |
| Everett et al. (2000)    | Entiat Mud Creek 203     | WA | 15.32   | Predicted  | 18.63  |



|                                       |                             |    |       |            |       |
|---------------------------------------|-----------------------------|----|-------|------------|-------|
| Everett et al. (2000)                 | Nile Creek 5                | WA | 15.46 | Predicted  | 18.80 |
| Everett et al. (2000)                 | Quartzite 1                 | WA | 15.54 | Predicted  | 18.90 |
| Everett et al. (2000)                 | Entiat Mud Creek 208        | WA | 16.02 | Predicted  | 19.48 |
| Everett et al. (2000)                 | Entiat Mud Creek 167        | WA | 16.17 | Predicted  | 19.66 |
| Everett et al. (2000)                 | Frosty 8                    | WA | 16.38 | Predicted  | 19.92 |
| Wright (1996); Wright and Agee (2004) | Teanaway Demonstration Area | WA | 16.43 | Calibrated | 20.20 |
| Everett et al. (2000)                 | Quartzite 8                 | WA | 16.73 | Predicted  | 20.34 |
| Everett et al. (2000)                 | Entiat Mud Creek 200        | WA | 16.84 | Predicted  | 20.48 |
| Everett et al. (2000)                 | Quartzite 6                 | WA | 16.93 | Predicted  | 20.59 |
| Everett et al. (2000)                 | Nile Creek 3                | WA | 17.22 | Predicted  | 20.94 |
| Everett et al. (2000)                 | Quartzite 3                 | WA | 17.40 | Predicted  | 21.16 |
| Everett et al. (2000)                 | Frosty 7                    | WA | 17.47 | Predicted  | 21.24 |
| Everett et al. (2000)                 | Nile Creek 9                | WA | 17.66 | Predicted  | 21.47 |
| Everett et al. (2000)                 | Entiat Mud Creek 206        | WA | 17.78 | Predicted  | 21.62 |
| Everett et al. (2000)                 | Quartzite 2                 | WA | 18.10 | Predicted  | 22.01 |
| Everett et al. (2000)                 | Nile Creek 4                | WA | 18.14 | Predicted  | 22.06 |
| Everett et al. (2000)                 | Frosty 4                    | WA | 18.51 | Predicted  | 22.51 |
| Everett et al. (2000)                 | Frosty 3                    | WA | 18.68 | Predicted  | 22.71 |
| Everett et al. (2000)                 | Frosty 2                    | WA | 19.00 | Predicted  | 23.10 |
| Everett et al. (2000)                 | South Deep 1                | WA | 19.01 | Predicted  | 23.12 |
| Everett et al. (2000)                 | Quartzite 4                 | WA | 19.17 | Predicted  | 23.31 |
| Everett et al. (2000)                 | Nile Creek 8                | WA | 19.36 | Predicted  | 23.54 |
| Everett et al. (2000)                 | Quartzite 5                 | WA | 19.53 | Predicted  | 23.75 |
| Everett et al. (2000)                 | Entiat Mud Creek 204        | WA | 19.76 | Predicted  | 24.03 |
| Everett et al. (2000)                 | Nile Creek 2                | WA | 20.28 | Predicted  | 24.66 |
| Everett et al. (2000)                 | Nile Creek 6                | WA | 20.36 | Predicted  | 24.76 |
| Everett et al. (2000)                 | Frosty 1                    | WA | 20.38 | Predicted  | 24.78 |
| Everett et al. (2000)                 | Nile Creek 1                | WA | 21.09 | Predicted  | 25.65 |
| Wright (1996); Wright and Agee (2004) | Teanaway Demonstration Area | WA | 16.43 | Calibrated | 26.00 |
| Everett et al. (2000)                 | Entiat Mud Creek 211        | WA | 21.71 | Predicted  | 26.40 |
| Everett et al. (2000)                 | Twenty Mile 3               | WA | 22.85 | Predicted  | 27.79 |
| Everett et al. (2000)                 | Frosty 6                    | WA | 23.20 | Predicted  | 28.21 |
| Everett et al. (2000)                 | Quartzite 7                 | WA | 24.28 | Predicted  | 29.52 |
| Everett et al. (2000)                 | Nile Creek 11               | WA | 24.65 | Predicted  | 29.97 |

|                                           |                         |    |       |            |       |
|-------------------------------------------|-------------------------|----|-------|------------|-------|
| Heyerdahl (1997), Heyerdahl et al. (2001) | Tucannon                | WA | 39.80 | Calibrated | 30.50 |
| Everett et al. (2000)                     | Twenty Mile 4           | WA | 25.60 | Predicted  | 31.13 |
| Everett et al. (2000)                     | Twenty Mile 1           | WA | 26.03 | Predicted  | 31.65 |
| Everett et al. (2000)                     | Frosty 5                | WA | 26.10 | Predicted  | 31.74 |
| Everett et al. (2000)                     | Twenty Mile 2           | WA | 26.68 | Predicted  | 32.44 |
| Everett et al. (2000)                     | Nile Creek 7            | WA | 29.34 | Predicted  | 35.68 |
| Everett et al. (2000)                     | Twenty Mile 6           | WA | 29.54 | Predicted  | 35.92 |
| Everett et al. (2000)                     | Twenty Mile 7           | WA | 31.24 | Predicted  | 37.99 |
| Everett et al. (2000)                     | South Deep 6            | WA | 31.58 | Predicted  | 38.40 |
| Everett et al. (2000)                     | Twenty Mile 8           | WA | 32.42 | Predicted  | 39.42 |
| Everett et al. (2000)                     | Twenty Mile 13          | WA | 33.75 | Predicted  | 41.04 |
| Heyerdahl (1997), Heyerdahl et al. (2001) | Tucannon                | WA | 39.80 | Calibrated | 41.40 |
| Kernan and Hessel (2010)                  | South Deep              | WA | -     | Calibrated | 45.30 |
| Everett et al. (2000)                     | Twenty Mile 9           | WA | 40.17 | Predicted  | 48.85 |
| Everett et al. (2000)                     | Twenty Mile 12          | WA | 40.20 | Predicted  | 48.88 |
| Everett et al. (2000)                     | South Deep 7            | WA | 41.91 | Predicted  | 50.96 |
| Everett et al. (2000)                     | South Deep 3            | WA | 43.33 | Predicted  | 52.69 |
| Everett et al. (2000)                     | South Deep 5            | WA | 44.13 | Predicted  | 53.66 |
| Everett et al. (2000)                     | South Deep 9            | WA | 47.74 | Predicted  | 58.05 |
| Everett et al. (2000)                     | Twenty Mile 10          | WA | 48.96 | Predicted  | 59.54 |
| Everett et al. (2000)                     | South Deep 11a          | WA | 51.65 | Predicted  | 62.81 |
| Everett et al. (2000)                     | South Deep 11b          | WA | 51.65 | Predicted  | 62.81 |
| Everett et al. (2000)                     | South Deep 12           | WA | 51.65 | Predicted  | 62.81 |
| Everett et al. (2000)                     | South Deep 14           | WA | 51.82 | Predicted  | 63.01 |
| Everett et al. (2000)                     | South Deep 4            | WA | 53.37 | Predicted  | 64.90 |
| Everett et al. (2000)                     | South Deep 10           | WA | 55.09 | Predicted  | 66.99 |
| Everett et al. (2000)                     | Twenty Mile 11          | WA | 67.38 | Predicted  | 81.93 |
| <i>WYOMING</i>                            |                         |    |       |            |       |
| Brown (2003)                              | Cold Springs Creek      | WY | 24.63 | Predicted  | 29.95 |
| Brown et al. (2000)                       | Ashenfelder Lower       | WY | 45.88 | Predicted  | 55.79 |
| Brown et al. (2000)                       | Ashenfelder Upper       | WY | 45.88 | Predicted  | 55.79 |
| <i>MEXICO</i>                             |                         |    |       |            |       |
| Skinner et al. (2008)                     | PINO (San Pedro Martir) | MX | 19.04 | Predicted  | 23.15 |
| Skinner et al. (2008)                     | BLAN (San Pedro Martir) | MX | 22.18 | Predicted  | 26.97 |
| Skinner et al. (2008)                     | PYRA (San Pedro Martir) | MX | 24.89 | Predicted  | 30.27 |

|                                |                           |    |       |            |       |
|--------------------------------|---------------------------|----|-------|------------|-------|
| Skinner et al. (2008)          | WEST (San Pedro Martir)   | MX | 25.02 | Predicted  | 30.42 |
| Skinner et al. (2008)          | TASA (San Pedro Martir)   | MX | 26.55 | Predicted  | 32.28 |
| Skinner et al. (2008)          | VALL (San Pedro Martir)   | MX | 26.67 | Predicted  | 32.43 |
| Skinner et al. (2008)          | PUER (San Pedro Martir)   | MX | 28.07 | Predicted  | 34.13 |
| Skinner et al. (2008)          | CORO (San Pedro Martir)   | MX | 30.94 | Predicted  | 37.62 |
| Skinner et al. (2008)          | AZUL (San Pedro Martir)   | MX | 55.99 | Predicted  | 68.08 |
| <i>CANADA-BRITISH COLUMBIA</i> |                           |    |       |            |       |
| Heyerdahl et al. (2012)        | Middle Stein River Valley | BC | 27.93 | Calibrated | 40.49 |

*Notes*

- † Observations are in increasing order of calibrated/predicted PMFI/FR within each state
- ‡ Missing observations in this column occur because some calibration cases did not have an FHX file and did not report this statistic in the publication.
- § Mean ITFI could not be estimated, but mean CFI-all could be, is reported here, and was used to estimate PMFI/FR
- ¶ Mean ITFI could not be estimated, but mean CFI-10% could be, is reported here, and was used to estimate PMFI/FR

**Literature Cited**

Allen, C. D. 1989. Changes in the landscape of the Jemez Mountains, New Mexico. Ph.D. dissertation. University of California, Berkeley.

Arabas, K. B., K. S. Hadley, and E. R. Larson. 2006. Fire history of a naturally fragmented landscape in central Oregon. *Canadian Journal of Forest Research* 36:1108-1120.

Baisan, C. H., and T. W. Swetnam. 1990. Fire history on a desert mountain range: Rincon Mountain Wilderness, Arizona, U.S.A. *Canadian Journal of Forest Research* 20:1559-1569.

Baisan, C. H., and Swetnam, T. W. 1997. Interactions of fire regimes and land use in the central Rio Grande Valley. USDA Forest Service Research Paper RM-RP-330, Rocky Mountain Forest and Range Experiment Station, Fort Collins, Colorado.

Baisan, C. H., K. A. Morino, H. D. Grissino-Mayer, and T. W. Swetnam. 1998. Fire history in ponderosa pine and mixed-conifer forests of the Catalina Mountains. Final Report, Laboratory of Tree-Ring Research, University of Arizona, Tucson.

Baker, W. L. 2006. Fire history in ponderosa pine landscapes of Grand Canyon National park: is it reliable enough for management and restoration? *International Journal of Wildland Fire* 15:433-437.

Beaty, R. M., and A. H. Taylor. 2001. Spatial and temporal variation of fire regimes in a mixed conifer forest landscape, southern Cascades, California, USA. *Journal of Biogeography* 28:955-966.

Bekker, M. F., and A. H. Taylor. 2001. Gradient analysis of fire regimes in montane forests of the southern Cascade Range, Thousand Lakes Wilderness, California, USA. *Plant Ecology* 155:15-28.

Bigio, E. R. 2013. Late Holocene fire and climate history of the western San Juan Mountains, Colorado: Results from alluvial stratigraphy and tree-ring methods. PhD dissertation, University of Arizona, Tucson.

Bigio, E., T. W. Swetnam, and C. H. Baisan. 2010. A comparison and integration of tree-ring and alluvial records of fire history at the Missionary Ridge Fire, Durango, Colorado, USA. *The Holocene* 20:1047-1061.

Bork, J. L. 1984. Fire history in three vegetation types of the eastern side of the Oregon

- Cascades. Ph.D. dissertation. Oregon State University, Corvallis.
- Brown, P. M. 2003. Fire, climate, and forest structure in ponderosa pine forests of the Black Hills. PhD dissertation, Colorado State University, Fort Collins.
- Brown, P. M. 2006. Climate effects on fire regimes and tree recruitment in Black Hills ponderosa pine forests. *Ecology* 87:2500-2510.
- Brown, P. M., and W. D. Shepperd. 2001. Fire history and fire climatology along a 5° gradient in latitude in Colorado and Wyoming, USA. *Palaeobotanist* 50:133-140.
- Brown, P. M., and C. H. Sieg. 1996. Fire history in interior ponderosa pine communities of the Black Hills, South Dakota, USA. *International Journal of Wildland Fire* 6:97-105.
- Brown, P. M., and C. H. Sieg. 1999. Historical variability in fire at the ponderosa pine - northern Great Plains prairie ecotone, southeastern Black Hills, South Dakota. *Ecoscience* 6:539-547.
- Brown, P. M., C. L. Wienk, and A. J. Symstad. 2008. Fire and forest history at Mount Rushmore. *Ecological Applications* 18:1984-1999.
- Brown, P. M., and R. Wu. 2005. Climate and disturbance forcing of episodic tree recruitment in a southwestern ponderosa pine landscape. *Ecology* 86:3030-3038.
- Brown, P. M., M. G. Ryan, and T. G. Andrews. 2000. Historical surface fire frequency in ponderosa pine stands in Research Natural Areas, central Rocky Mountains and Black Hills, USA. *Natural Areas Journal* 20:133-139.
- Brown, P. M., M. W. Kaye, L. S. Huckaby, and C. H. Baisan. 2001. Fire history along environmental gradients in the Sacramento Mountains, New Mexico: Influences of local patterns and regional processes. *Ecoscience* 8:115-126.
- Caprio, A. C., and T. W. Swetnam. 1995. Historic fire regimes along an elevational gradient on the west slope of the Sierra Nevada, California. Pages 173-179 In: J. K. Brown, R. W. Mutch, C. W. Spoon, and R. H. Wakimoto, editors. *Proceedings: symposium on fire in wilderness and park management*. USDA Forest Service General Technical Report INT-GTR-320, Intermountain Research Station, Ogden, Utah.
- Danzer, S. R. 1998. Fire history and stand structure in the Huachuca Mountains of southeastern Arizona. Master's. University of Arizona, Tucson.
- Dieterich, J. H. 1980. Chimney Spring forest fire history. USDA Forest Service Research Paper RM-220, Rocky Mountain Forest and Range Experiment Station, Fort Collins, Colorado.
- Dieterich, J. H. 1983. Fire history of southwestern mixed conifer: a case study. *Forest Ecology and Management* 6:13-31.
- Dieterich, J. H., and A. R. Hibbert. 1990. Fire history in a small ponderosa pine stand surrounded by chaparral. Page 168-173 In: Krammes, J. S., editor. *Effects of fire management of southwestern natural resources*. Gen. Tech. Rep. RM-GTR-191. Fort Collins, CO: U.S. Department of Agriculture, Forest Service, Rocky Mountain Forest and Range Experiment Station.
- Donnegan, J. A., T. T. Veblen, and J. S. Sibold. 2001. Climatic and human influences on fire history in Pike National Forest, central Colorado. *Canadian Journal of Forest Research* 31:1526-1539.
- Dugan, A. J., and W. L. Baker. 2014. Modern calibration and historical testing of small-area, fire-interval reconstruction methods. *International Journal of Wildland Fire* 23:58-68.
- Dugan, A. J., and W. L. Baker. 2015. Sequentially contingent fires, droughts and pluvials structured a historical dry forest landscape and suggest future contingencies. *Journal of Vegetation Science* 26:697-710.
- Everett, R. G. 2003. Grid-based fire-scar dendrochronology and vegetation sampling in the mixed-conifer forests of the San Bernardino and San Jacinto Mountains of southern California. PhD dissertation, University of California, Riverside, California.
- Everett, R. L., R. Schellhaas, D. Keenum, D. Spurbeck, and P. Ohlson. 2000. Fire history in the

- ponderosa pine/Douglas-fir forests on the east slope of the Washington Cascades. *Forest Ecology and Management* 129:207-225.
- Farris, C. A. 2009. Comparison of multiple methods for inferring fire history in a Sky Island mountain range. Ph.D. dissertation. University of Arizona, Tucson, Arizona, USA.
- Farris, C. A., C. H. Baisan, D. A. Falk, M. L. Van Horne, and Fulé. 2013. A comparison of targeted and systematic fire-scar sampling for estimating historical fire frequency in south-western ponderosa pine forests. *International Journal of Wildland Fire* 22:1021-1033.
- Fiegner, R. P. 2002. The influence of sampling intensity on the fire history of the Teakettle Experimental Forest, Sierra Nevada, California: small fire detection, the composite fire chronology, and fire interval calculation. University of California, Davis.
- Fulé, P. Z., W. W. Covington, and M. M. Moore. 1997. Determining reference conditions for ecosystem management of southwestern ponderosa pine forests. *Ecological Applications* 7:895-908.
- Fulé, P. Z., J. E. Crouse, T. A. Heinlein, M. M. Moore, W. W. Covington, and G. Verkamp. 2003a. Mixed-severity fire regime in a high-elevation forest of Grand Canyon, Arizona, USA. *Landscape Ecology* 18:465-486.
- Fulé, P. Z., T. A. Heinlein, W. W. Covington, and M. M. Moore. 2003b. Assessing fire regimes on Grand Canyon landscapes with fire-scar and fire-record data. *International Journal of Wildland Fire* 12:129-145.
- Fulé, P. Z., J. E. Korb, and R. Wu. 2009. Changes in forest structure of a mixed conifer forest, southwestern Colorado, USA. *Forest Ecology and Management* 258:1200-1210.
- Grissino-Mayer, H. D. 1995. Tree-ring reconstructions of climate and fire history at El Malpais National Monument, New Mexico. PhD dissertation, University of Arizona, Tucson.
- Grissino-Mayer, H. D., and T. W. Swetnam. 1997. Multi-century history of wildfire in the ponderosa pine forests of El Malpais National Monument. Bulletin 156, New Mexico Bureau of Mines and Mineral Resources, Socorro, New Mexico.
- Grissino-Mayer, H. D., W. H. Romme, M. L. Floyd, and D. D. Hanna. 2004. Climatic and human influences on fire regimes of the southern San Juan Mountains, Colorado, USA. *Ecology* 85:1708-1724.
- Heinlein, T. A., M. M. Moore, P. Z. Fulé, and W. W. Covington. 2005. Fire history and stand structure of two ponderosa pine-mixed conifer sites: San Francisco Peaks, Arizona, USA. *International Journal of Wildland Fire* 14: 307-320.
- Heyerdahl, E. K. 1997. Spatial and temporal variation in historical fire regimes of the Blue Mountains, Oregon and Washington: the influence of climate. Ph.D. dissertation. University of Washington, Seattle.
- Heyerdahl, E. K., L. B. Brubaker, and J. K. Agee. 2001. Spatial controls of historical fire regimes: a multiscale example from the interior West, USA. *Ecology* 82:660-678.
- Heyerdahl, E. K., K. Lertzman, and C. M. Wong. 2012. Mixed-severity fire regimes in dry forests of southern interior British Columbia, Canada. *Canadian Journal of Forest Research* 42:88-98.
- Heyerdahl, E. K., P. Morgan, and J. F. Riser II. 2008. Crossdated fire histories (1650 to 1900) from ponderosa pine-dominated forests of Idaho and western Montana. USDA Forest Service General Technical Report RMRS-GTR-214WWW, Rocky Mountain Research Station, Fort Collins, Colorado.
- Huffman, D. W., T. J. Ziegler, and P. Z. Fulé. 2015. Fire history of a mixed conifer forest on the Mogollon Rim, northern Arizona, USA. *International Journal of Wildland Fire* 24:680-689.
- Jones, L.A. 2005. A surface fire history of the Lubrecht Experimental Forest. Missoula, MT. Undergraduate thesis, University of Montana, Missoula.
- Kaye, M. W., and T. W. Swetnam. 1999. An assessment of fire, climate, and Apache history in

- the Sacramento Mountains, New Mexico. *Physical Geography* 20:305-330.
- Kernan, J. T., and A. E. Hessl. 2010. Spatially heterogeneous estimates of fire frequency in ponderosa pine forests of Washington, USA. *Fire Ecology* 6:117-135.
- Margolis, E. Q., and J. Balmat. 2009. Fire history and fire-climate relationships along a fire regime gradient in the Santa Fe Municipal Watershed, NM, USA. *Forest Ecology and Management* 258:2416-2430.
- Maruoka, K. R. 1994. Fire history of *Pseudotsuga menziesii* and *Abies grandis* stands in the Blue Mountains of Oregon and Washington. Master's thesis, University of Washington, Seattle, Washington.
- Morino, K. A. 1996. Reconstruction and interpretation of historical patterns of fire occurrence in the Organ Mountains, New Mexico. M.S. thesis, University of Arizona, Tucson.
- Scholl, A. E., and A. H. Taylor. 2010. Fire regimes, forest change, and self-organization in an old-growth mixed-conifer forest, Yosemite National Park, USA. *Ecological Applications* 20:362-380.
- Seklecki, M. T., H. D. Grissino-Mayer, and T. W. Swetnam. 1996. Fire history and the possible role of Apache-set fires in the Chiricahua Mountains of southeastern Arizona. Pages 238-246 In: Ffolliott, P. F., L. F. DeBano, M. B. Baker, Jr., G. J. Gottfried, G. Solis-Garza, C. B. Edminster, D. G. Neary, L. S. Allen, and R. H. Hamre, editors. *Effects of fire on Madrean province ecosystems: a symposium proceedings*. USDA Forest Service General Technical Report RM-GTR-289, Rocky Mountain Forest and Range Experiment Station, Fort Collins, Colorado.
- Shapiro-Miller, L. B., E. K. Heyerdahl, and P. Morgan. 2007. Comparison of fire scars, fire atlases, and satellite data in the northwestern United States. *Canadian Journal of Forest Research* 37:1933-1943.
- Skinner, C. N., J. H. Burk, M. G. Barbour, E. Franco-Vizcaino, and S. L. Stephens. 2008. Influences of climate on fire regimes in montane forests of north-western Mexico. *Journal of Biogeography* 35:1436-1451.
- Swetnam, T. W. 1990. Fire history and climate in the southwestern United States. Pages 6-17 In: J. S. Krammes, editor. *Effects of fire management of southwestern natural resources*. USDA Forest Service General Technical Report RM-191, Rocky Mountain Research Station, Fort Collins, Colorado.
- Swetnam, T. W., and C. H. Baisan. 1996. Historical fire regime patterns in the southwestern United States since AD 1700. Pages 11-32 In: C. D. Allen, editor. *Fire effects in southwestern forests, proceedings of the second La Mesa fire symposium*. USDA Forest Service General Technical Report RM-GTR-286, Rocky Mountain Forest and Range Experiment Station, Fort Collins, Colorado.
- Swetnam, T. W., C. H. Baisan, and J. M. Kaib. 2001. Forest fire histories of the Sky Islands of *La Frontera*. Pages 95-124 In: G. L. Webster, and C. J. Bahre, editors. *Changing plant life of La Frontera*. University of New Mexico Press, Albuquerque.
- Swetnam, T. W., and J. H. Dieterich. 1985. Fire history of ponderosa pine forests in the Gila Wilderness, New Mexico. Pages 390-397 In: *Proceedings-Symposium and workshop on wilderness fire*. USDA Forest Service General Technical Report INT-182, Intermountain Forest and Range Experiment Station, Ogden, Utah.
- Taylor, A. H. 2000. Fire regimes and forest changes in mid and upper montane forests of the southern Cascades, Lassen Volcanic National Park, California, U.S.A. *Journal of Biogeography* 27:87-104.
- Taylor, A. H., and C. N. Skinner. 1998. Fire history and landscape dynamics in a late-successional reserve, Klamath Mountains, California, USA. *Forest Ecology and Management* 111:285-301.

- Taylor, A. H., and C. N. Skinner. 2003. Spatial patterns and controls on historical fire regimes and forest structure in the Klamath Mountains. *Ecological Applications* 13:704-719.
- Touchan, R., C. D. Allen, and T. W. Swetnam. 1996. Fire history and climatic patterns in ponderosa pine and mixed-conifer forests of the Jemez Mountains, northern New Mexico. Pages 33-46 In: C. D. Allen, editor. *Fire effects in southwestern forests: proceedings of the second La Mesa fire symposium*. USDA Forest Service General Technical Report RM-GTR-286, Rocky Mountain Forest and Range Experiment Station, Fort Collins, Colorado.
- Veblen, T. T., T. Kitzberger, and J. Donnegan. 2000. Climatic and human influences on fire regimes in ponderosa pine forests in the Colorado Front Range. *Ecological Applications* 10:1178-1195.
- Wienk, C. L., C. H. Sieg, and G. R. McPherson. 2004. Evaluating the role of cutting treatments, fire and soil seed banks in an experimental framework in ponderosa pine forests of the Black Hills, South Dakota. *Forest Ecology and Management* 192:375-393.
- Wright, C. S. 1996. Fire history of the Teanaway River Drainage, Washington. M.S. Thesis, University of Washington, Seattle.
- Wright, C. S., and J. K. Agee. 2004. Fire and vegetation history in the eastern Cascade Mountains, Washington. *Ecological Applications* 14:443-459.
